# Supplementary material for: Insertion reactions of β-diketiminate-stabilised calcium amides with 1,3-dialkylcarbodiimides
Source: Royal Society of Chemistry journal article supplement (doi:10.1039/b717383k), 2008-01-01
Supplement: b717383k.pdf [file b717383k.pdf]

**Supplementary information for:**

**Insertion reactions of  $\beta$ -diketiminato-stabilised calcium amides with 1,3-dialkylcarbodiimides**

Mark R. Crimmin,<sup>a</sup> Anthony G. M. Barrett,\*<sup>a</sup> Michael S. Hill,\*<sup>a</sup> Peter B. Hitchcock<sup>b</sup> and Panayiotis A. Procopiou.<sup>c</sup>

<sup>a</sup> *Department of Chemistry, Imperial College London, Exhibition Road, South Kensington, London, SW7 2AZ, U.K.*

<sup>b</sup> *The Chemistry Laboratory, University of Sussex, Falmer, Brighton, East Sussex, BN1 9QJ, U.K.*

<sup>c</sup> *GlaxoSmithKline Medicines Research Centre, Gunnels Wood Road, Stevenage, Hertfordshire, SG1 2NY, U.K.*

**General Procedures**

All manipulations were carried out using standard Schlenk line and glovebox techniques under an inert atmosphere of either nitrogen or argon. NMR experiments were conducted in Youngs tap NMR tubes made up and sealed in a Glovebox, NMR were collected on recorded either Bruker AV-500 spectrometer at (<sup>13</sup>C NMR 125.8 Hz) or a Bruker AV-400 spectrometer (<sup>13</sup>C NMR 100.6 MHz). Solvents (Toluene, Benzene, THF, Hexane) were dried by distillation from sodium-benzophenone ketyl, under nitrogen and stored in ampoules over molecular sieves. C<sub>6</sub>D<sub>6</sub> and d<sub>8</sub>-toluene were purchased from Goss Scientific Instruments Ltd. and dried over molten potassium before distilling under nitrogen and storing over molecular sieves. (Tetrakis(trimethylsilyl))silane (TMSS) was purchased from Goss Scientific Instruments Ltd. and used as received. 1,3-Dialkylcarbodiimides were purchased from Sigma-Aldrich and used as received. The  $\beta$ -diketiminato ligand,<sup>1</sup> and heteroleptic calcium amides **1-4** were synthesised by literature procedures.<sup>2-3</sup>

## NMR Scales reactions

In a glovebox the  $\beta$ -diketiminate stabilised calcium amide (**2-4**, 0.05 mmol) was dissolved in  $C_6D_6$ , the 1,3-dialkylcarbodiimide (0.05 mmol) was added via micropipette (or as a solid) and the solution was transferred to a Youngs tap NMR tube. The reaction was monitored by  $^1H$  and  $^{13}C$  NMR spectroscopy. *In situ*  $^1H$  NMR data ( $C_6D_6$ , 298 K, 400 MHz) **5**: 0.97 (d, 12H,  $J = 6.2$  Hz), 1.31 (d, 12H,  $J = 6.8$  Hz), 1.32 (d, 12H,  $J = 6.8$  Hz), 1.39 (d, 12H,  $J = 6.9$  Hz), 1.77 (s, 6H), 3.49 (hept, 4H,  $J = 6.8$  Hz), 3.55 (hept, 2H,  $J = 6.2$  Hz), 3.73 (hept, 2H,  $J = 6.9$  Hz), 4.88 (s, 1H), 5.22 (s, 1H), 7.13-7.20 (m, 9H).

**Figure 1.** NMR scale reaction between **2** and 1,3-diisopropylcarbodiimide. Top (isolated compound **2**), bottom (30 min after addition of a 1,3-diisopropylcarbodiimide).

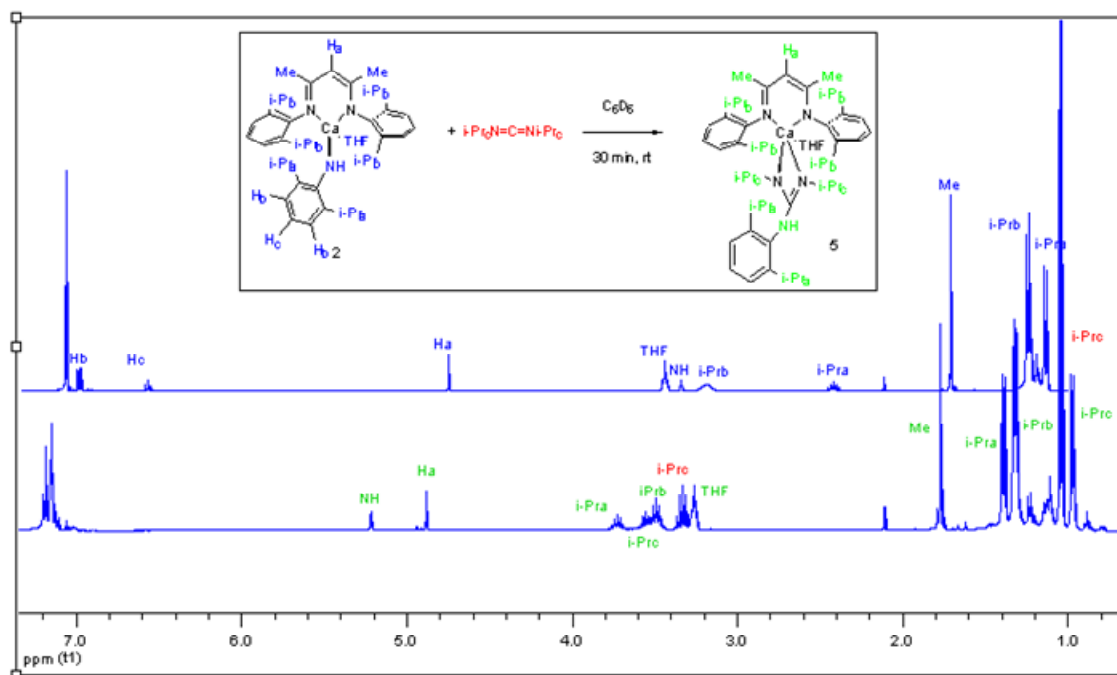

## Synthesis of heteroleptic guanidinate complexes

**6:** To a solution of [ $\{\text{ArNC}(\text{Me})\text{CHC}(\text{Me})\text{NAr}\}\text{Ca}(\text{NHAr})(\text{THF})$ ] (**2**, 600 mg, 0.87 mmol) in hexane was added 1,3-dicyclohexylcarbodiimide (178 mg, 0.86 mmol) as a solution in the same solvent. The solution was stirred for 1 h at room temperature, filtered and the volume reduced to induce crystallization. **6** was isolated as a colourless crystalline solid (mg, mmol, %) yield by  $^1\text{H}$  NMR.  $^1\text{H}$  NMR ( $\text{C}_6\text{D}_6$ , 298K, 400 MHz) 0.98-1.07 (m, 9H), 1.15 (m, 4H, *THF*), 1.29 (d, 12H,  $J = 6.9$  Hz), 1.33 (d, 12H,  $J = 6.8$  Hz), 1.40 (d, 12H,  $J = 6.8$  Hz), 1.49-1.52 (m, 3H), 1.61-1.66 (m, 8H), 1.70 (s, 6H), 2.98-3.03 (m, 2H), 3.33 (m, 4H, *THF*), 3.47 (hept, 4H,  $J = 6.8$  Hz), 3.67 (m, 12H,  $J = 6.9$  Hz), 4.91 (s, 1H), 5.26 (broad s, 1H), 7.10-7.21 (m, 9H);  $^{13}\text{C}$  NMR ( $\text{C}_6\text{D}_6$ , 298K, 125.8 MHz) 25.1, 25.2, 25.4, 26.5, 26.6, 28.3, 28.3, 28.5, 37.7, 54.8, 68.3, 93.5, 123.2, 123.6, 123.7, 124.0, 138.9, 141.6, 144.9, 148.4, 160.3, 165.4. Anal. Calc. for  $\text{C}_{58}\text{H}_{89}\text{CaN}_5\text{O}$ : C 76.28 H 9.75 N 7.67. Found: C..H..N.

**7:** To a solution of [ $\{\text{ArNC}(\text{Me})\text{CHC}(\text{Me})\text{NAr}\}\text{Ca}(\text{NPh}_2)(\text{THF})$ ] (**3**, 516 mg, 0.74 mmol) in hexane was added 1,3-dicyclohexylcarbodiimide (154 mg, 0.74 mmol) as a solution in the same solvent. The solution was stirred for 1 h at room temperature, filtered and the volume reduced to induce crystallization. **7** was isolated as a colourless crystalline solid (148 mg, 0.164 mmol, 22 %).  $^1\text{H}$  NMR ( $\text{C}_6\text{D}_6$ , 298K, 500 MHz) 0.80-1.02 (m, 5H), 1.08-1.21 (m, 7H), 1.13 (m, 4H, *THF*), 1.24 (d, 12H,  $J = 6.8$  Hz), 1.38 (d, 12H,  $J = 6.8$  Hz), 1.48-1.58 (m, 8H), 1.77 (s, 6H), 3.34 (m, 2H), 3.36 (hept, 4H,  $J = 6.8$  Hz), 3.48 (m, 4H, *THF*), 4.95 (s, 1H), 6.86 (t, 2H,  $J = 7.0$  Hz), 7.10-7.23 (m, 10H), 7.38 (d, 4H,  $J = 8.0$  Hz);  $^{13}\text{C}$  NMR ( $\text{C}_6\text{D}_6$ , 298K, 125.8 MHz) 24.7, 25.2, 25.5, 25.9, 26.3, 26.6, 28.5, 37.1, 56.0, 68.8, 94.1, 120.7, 121.5, 123.9, 124.2, 129.2, 141.5, 146.2, 148.5, 163.0, 165.7. Anal. Calc. for  $\text{C}_{58}\text{H}_{81}\text{CaN}_5\text{O}$ : C 76.96 H 8.96 N 7.74. Found: C..H..N.

**8·THF:** A solution of 2-methoxyethylamine (67 mg, 0.89 mmol), and 1,3-diisopropylcarbodiimide (112 mg, 0.89 mmol) in hexane (10 mL) were added to a

solution of **1** (600 mg, 0.89 mmol) in the same solvent (20 mL). The reaction was stirred for 1 h at room temperature, filtered and the solvent volume reduced to *ca* 10 mL. The product crystallised upon storage of this solution at -21°C for 24h, and isolation by filtration gave **8·THF** (230 mg, 0.32 mmol, 35 %) as a colourless crystalline solid. <sup>1</sup>H NMR (C<sub>6</sub>D<sub>6</sub>, 353K, 400 MHz) 1.02 (d, 6H, *J* = 6.0 Hz), 1.05 (d, 6H, *J* = 6.1 Hz), 1.29 (d, 12H, *J* = 6.8 Hz), 1.31 (d, 12H, *J* = 6.8 Hz), 1.50-1.54 (m, 4H), 1.75 (s, 6H), 2.91 (s, 3H), 3.10-3.16 (m, 4H), 3.20 (hept, 2H, *J* = 6.1 Hz), 3.34 (hept, 4H, *J* = 6.8 Hz), 3.41 (broad s, 1H), 3.43 (hept, 2H, *J* = 6.0 Hz), 3.55-3.58 (m, 4H), 4.82 (s, 1H), 7.00-7.15 (m, 6H); <sup>13</sup>C NMR (C<sub>6</sub>D<sub>6</sub>, 298K, 125.8 MHz) 20.9, 23.5, 24.0, 24.6, 25.2, 25.8, 26.7, 28.3, 28.6, 44.5, 46.6, 47.8, 58.5, 67.8, 76.9, 91.7, 94.2, 124.0, 123.6, 141.5, 147.4, 165.2, 165.7. Anal. Calc. for C<sub>43</sub>H<sub>71</sub>CaN<sub>5</sub>O<sub>2</sub>: C 70.67 H 9.72 N 9.59. Found: C..H..N.

## References

1. J. Feldman, S. J. McLain, A. Parthasarathy, W. Marshall, J. C. Calabrese and S. D. Arthur, *Organometallics* **1997**, *16*, 1514.
2. (a) M. H.Chisholm, J. C. Gallucci and K. Phophrari, *Inorg. Chem.*, 2004, **43**, 6717; (b) M. H.Chisholm, J. C. Gallucci and K. Phophrari, *Chem. Commun.*, 2003, 48.
3. (a) A. G. Avent, M. R. Crimmin, M. S. Hill and P. B. Hitchcock, *Dalton Trans.*, 2004, 3166; (b) A. G. Avent, M. R. Crimmin, M. S. Hill and P. B. Hitchcock, *Dalton Trans.*, 2005, 278

**NMR data for compounds 6,7 ( $C_6D_6$ , 298K ) and 8-THF ( $d_8$ -toluene, 298K)**



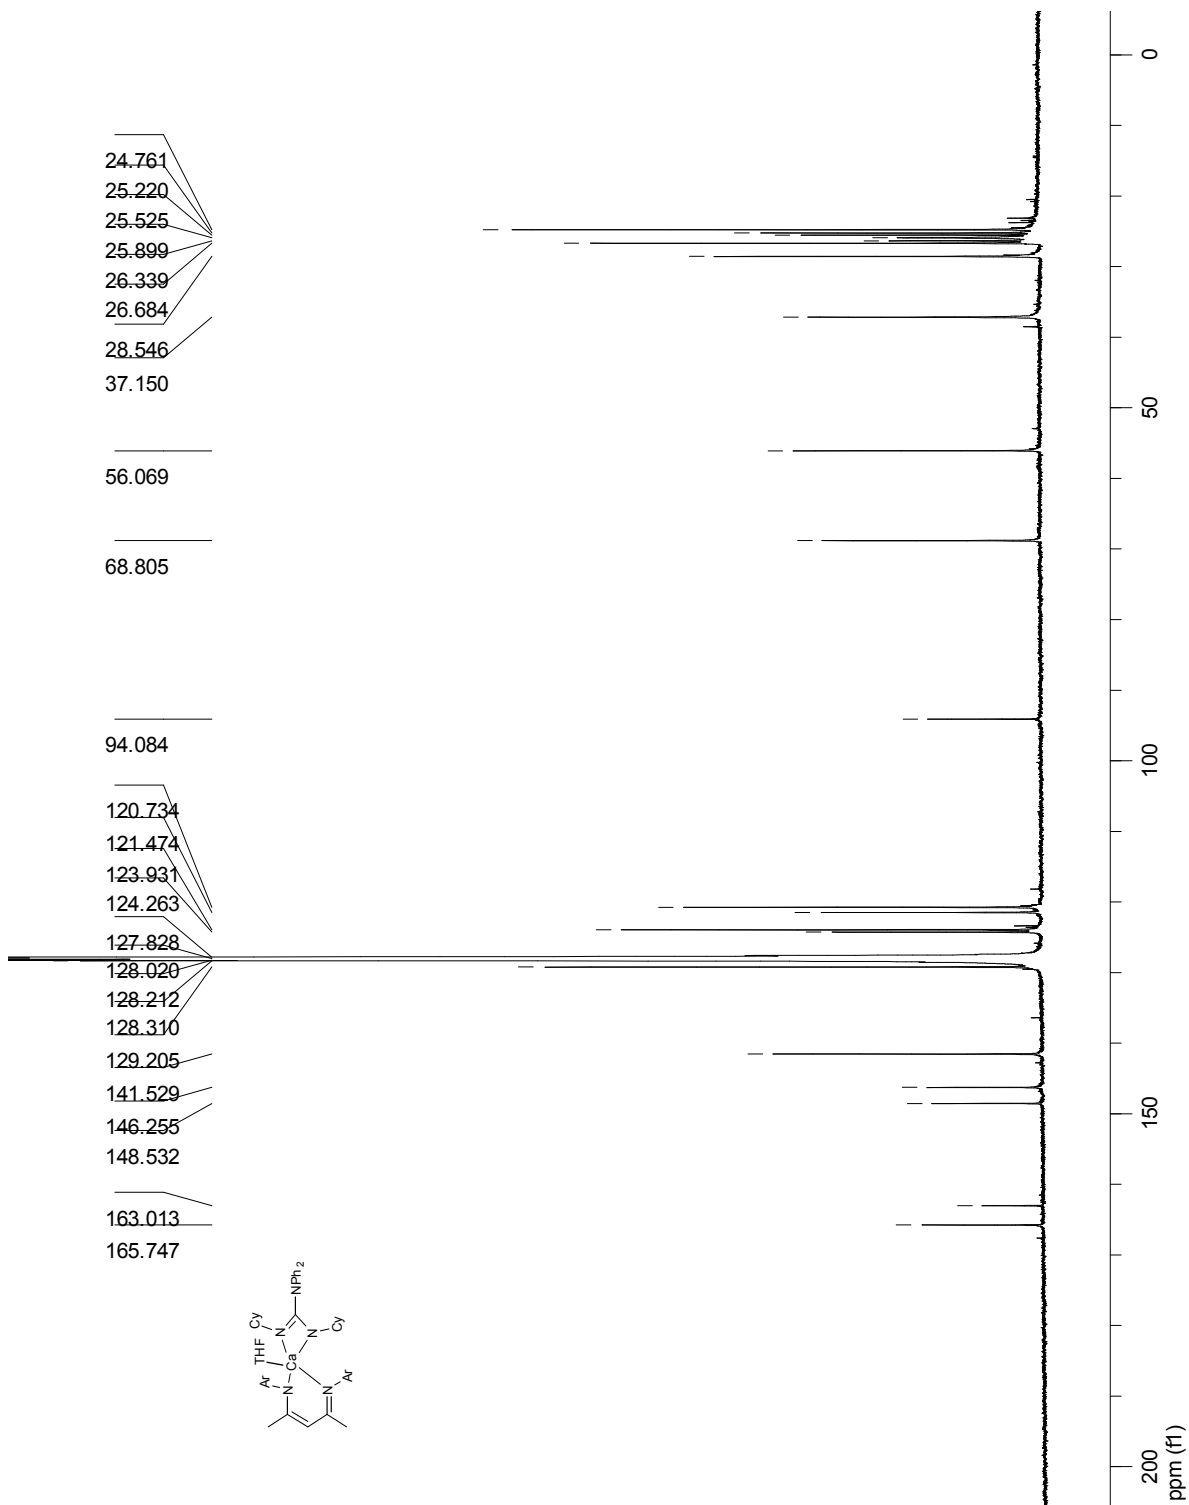





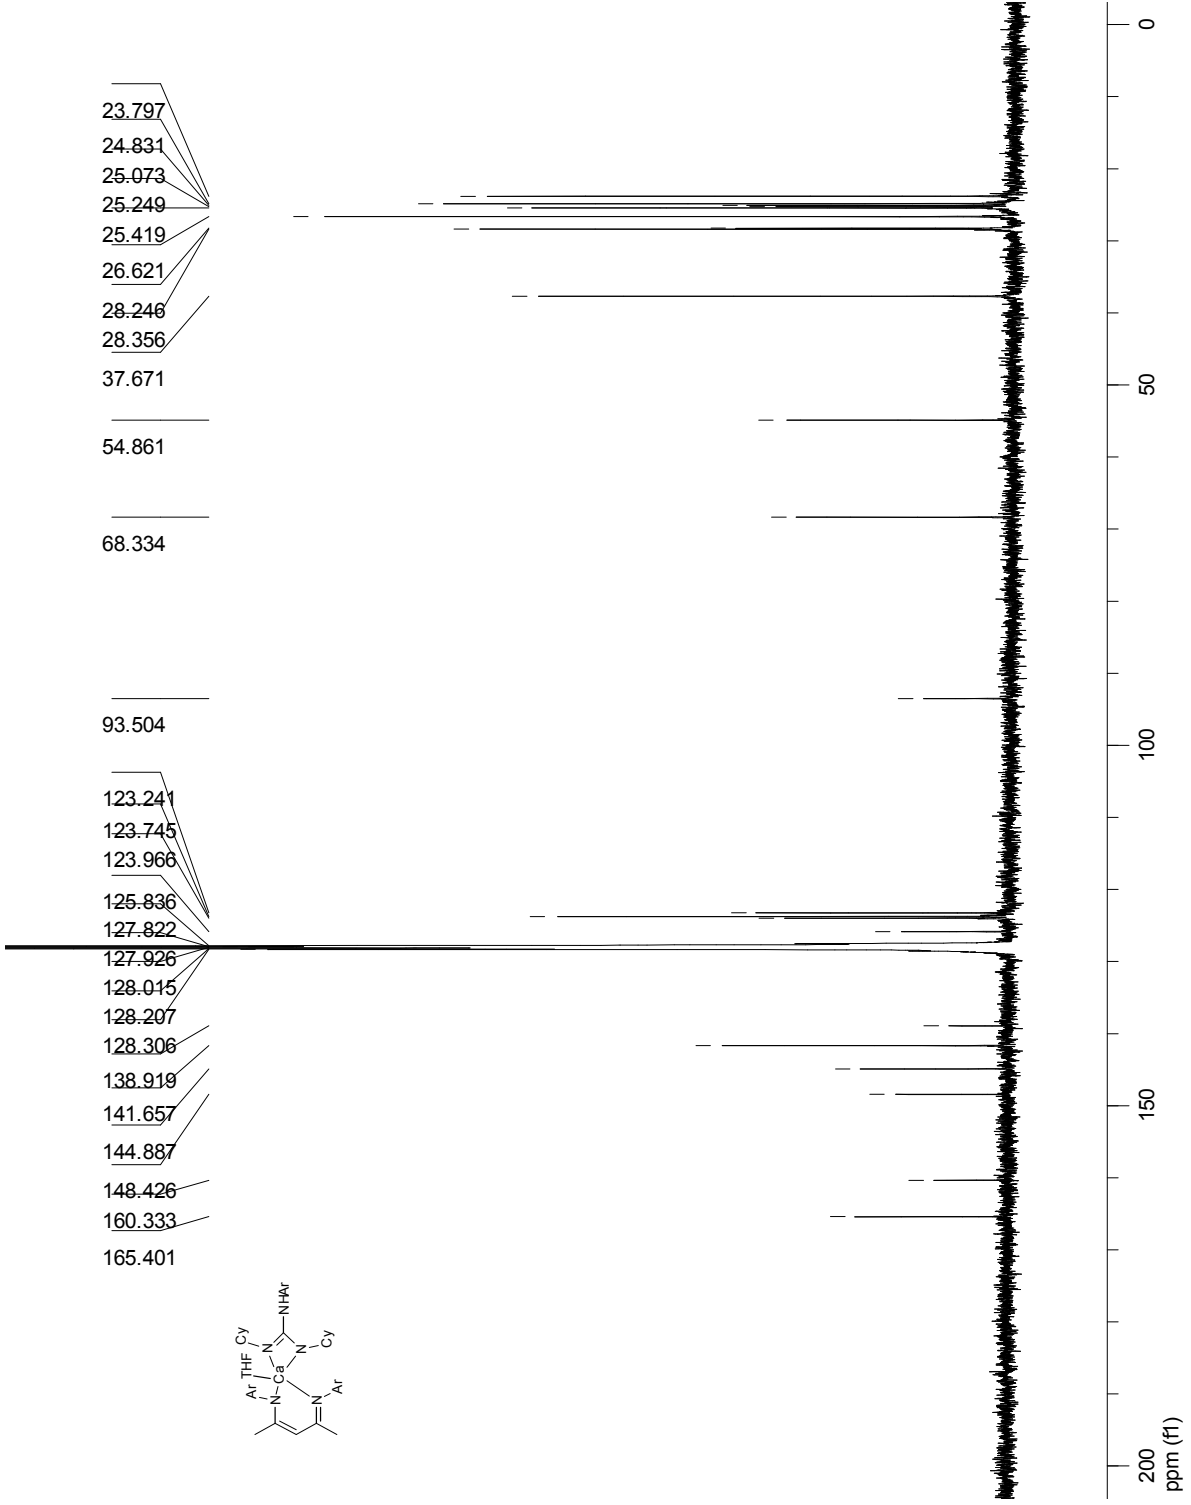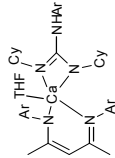



20.553  
 20.706  
 20.859  
 21.011  
 21.166  
 23.807  
 24.429  
 24.917  
 25.065  
 25.692  
 26.226  
 27.127  
 28.728  
 29.060  
 44.960  
 47.078  
 48.219  
 58.909  
 68.212  
 77.340  
 92.110  
 94.724  
 123.925  
 124.074  
 124.473  
 125.346  
 125.539  
 125.731  
 128.181  
 128.372  
 128.564  
 128.663  
 129.087  
 129.277  
 129.466  
 129.591  
 137.881  
 141.950  
 147.926  
 165.661  
 166.111

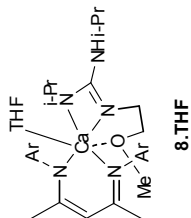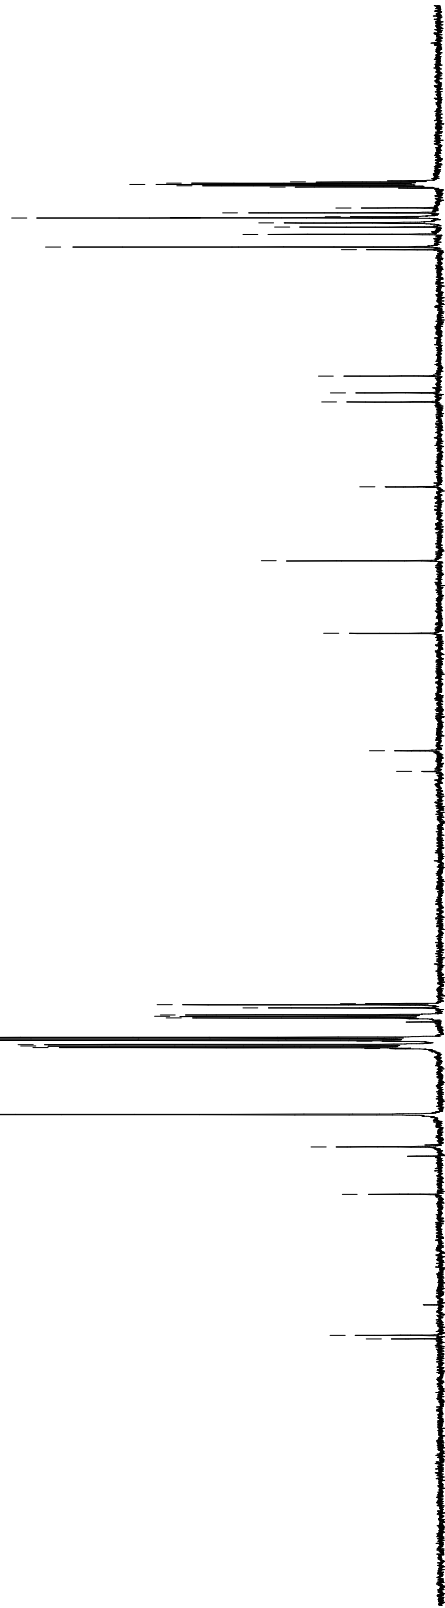

ppm (f1)
